# Supplementary material for: Genomic signature of MTOR could be an immunogenicity marker in human colorectal cancer
Source: Springer Nature journal article supplement (doi:10.1186/s12885-022-09901-w), 2022-07-26
Supplement: MOESM1 [file 23306000]

# Supplementary Fig.1

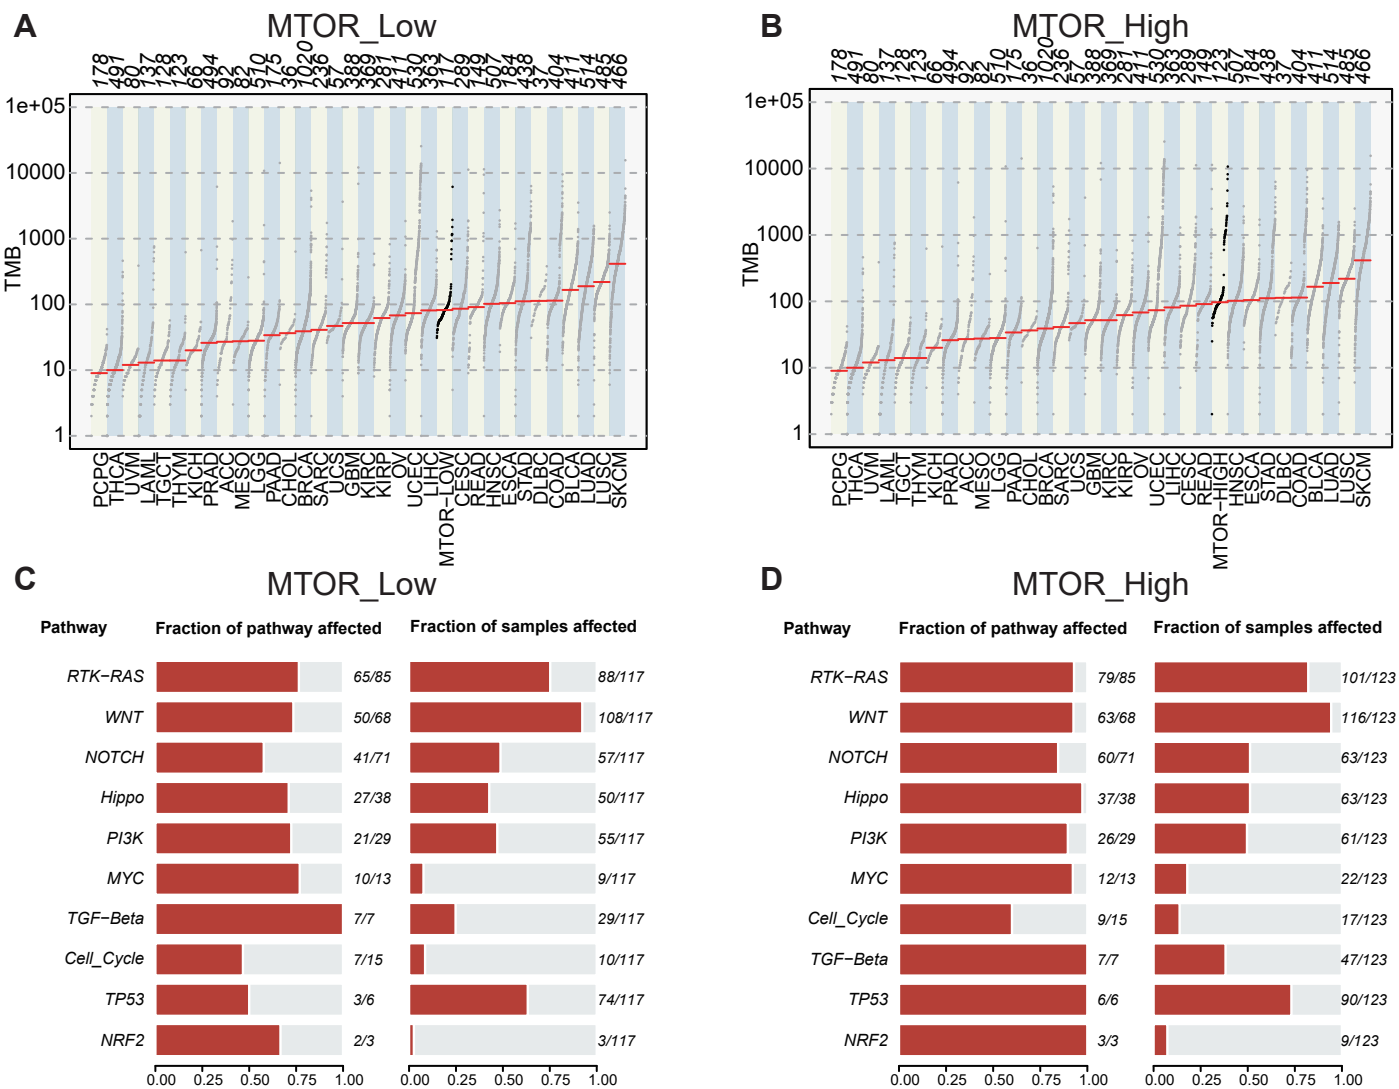

**A-B** TMB of the low and high *MTOR* expression groups was compared with different cancer cohorts in TCGA. Every dot represents a sample, and the red horizontal lines represent the median numbers of mutations in the respective cancer types. **C-D** Differences in the proportions of affected pathways between the low and high *MTOR* expression groups. TMB, tumor mutational burden; TCGA, The Cancer Genome Atlas.
