# Supplementary material for: Genomic signature of MTOR could be an immunogenicity marker in human colorectal cancer
Source: Springer Nature journal article supplement (doi:10.1186/s12885-022-09901-w), 2022-07-26
Supplement: MOESM2 [file 23306000]

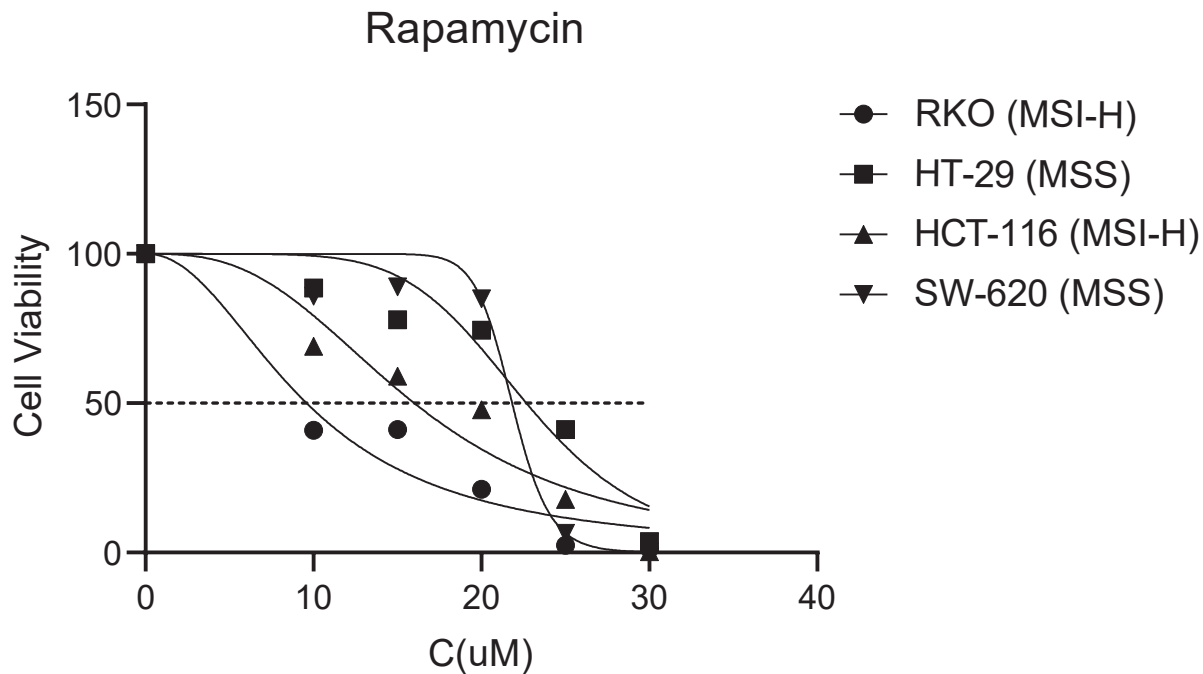

The inhibition curve showing the differential sensitivity of CRC cell lines to treatment with rapamycin. CRC, colorectal cancer.
